# Supplementary material for: One-pot synthesis of TEA functionalized and NiSe embedded rGO nanocomposites for supercapacitor application
Source: Royal Society of Chemistry journal article supplement (doi:10.1039/d1dt03399a), 2021-12-16
Supplement: d1dt03399a1.pdf [file d1dt03399a1.pdf]

Supporting Information (SI)

## Synthesis of TEA functionalized and NiSe embedded rGO nanocomposites for supercapacitor application

Sornalatha Manickam<sup>a</sup>, Hemalatha Kuzhandaivel<sup>\*a</sup>, yogapriya selvaraj<sup>a</sup>, Manick Clinton Franklin<sup>b</sup>, Karthick Sivalingam Nallathambi<sup>b</sup>

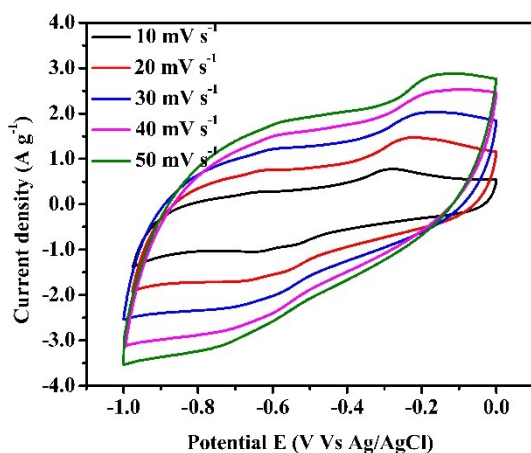

Fig. SI 1. The CV curves of N-rGO

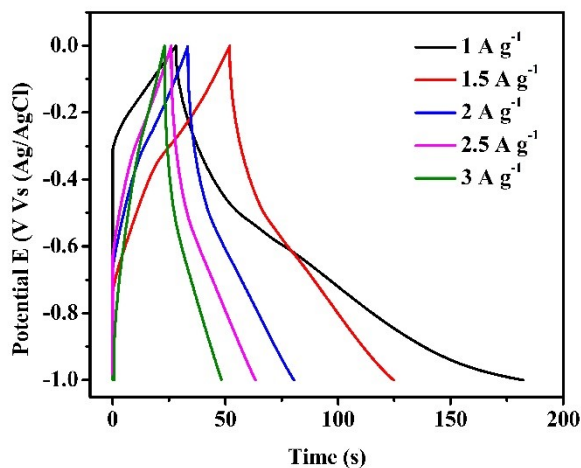

Fig. SI 2. The GCD curves of N-rGO

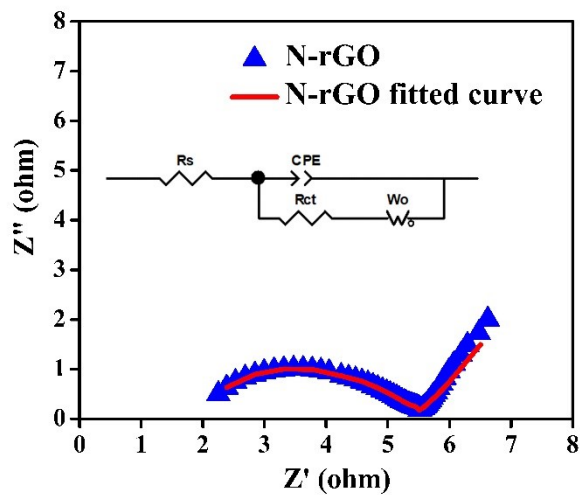

Fig. SI 3. The GVD curves of N-rGO

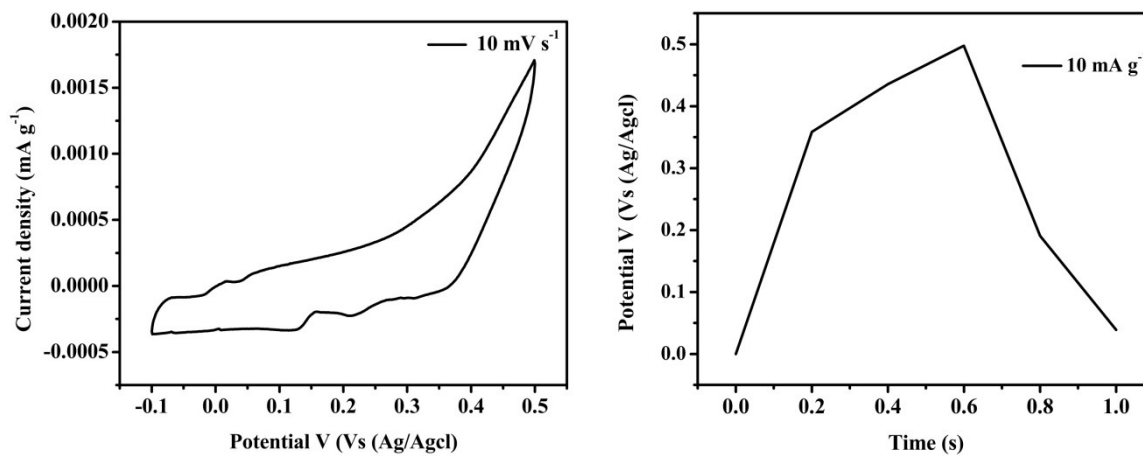

Fig. SI 4. The CV and GCD curves of the bare graphite sheet

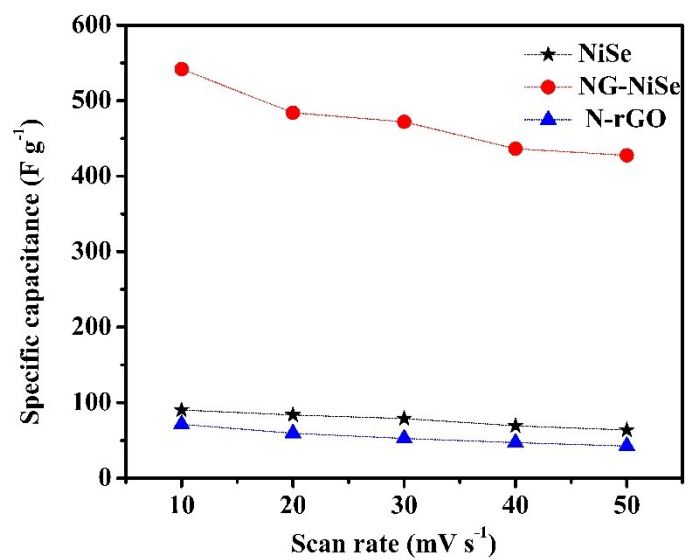

Fig. SI 5. The plot of scan rate Vs specific capacitance.
